# Supplementary material
Source: PubMed Central journal article supplement (PMC2077315)

**A**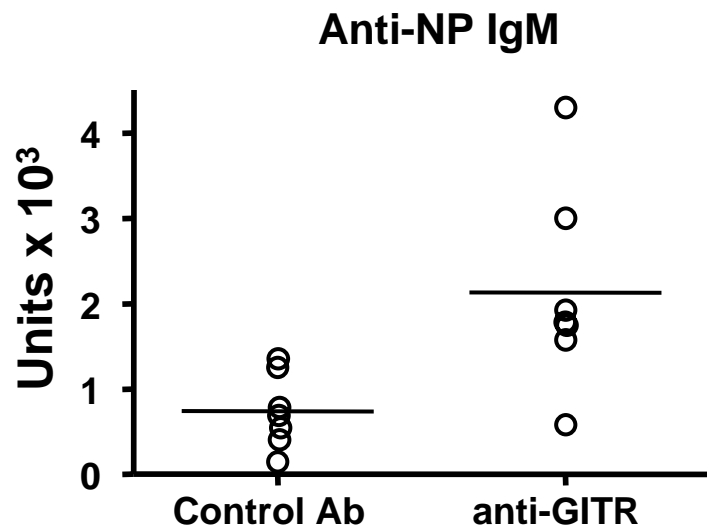**B**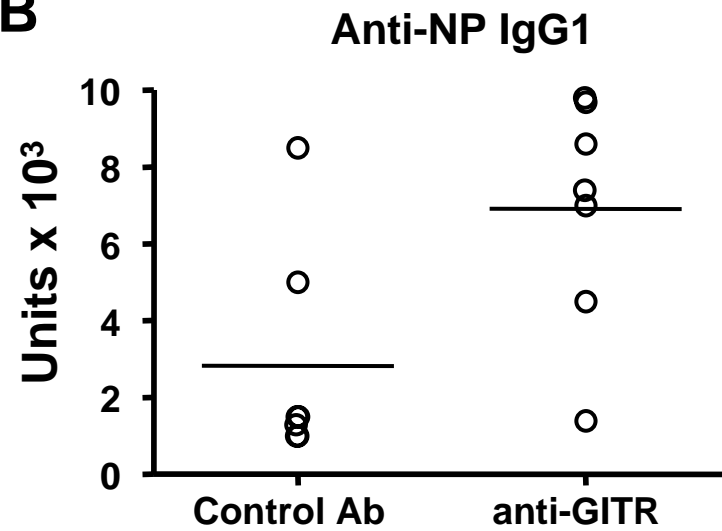**C**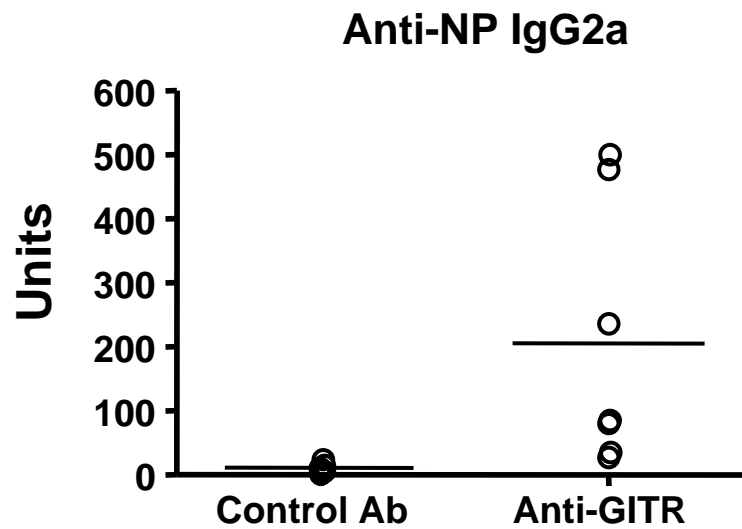

Supplement: blood_blood-2007-04-087171_1.pdf [file blood_blood-2007-04-087171_1.pdf]

**A**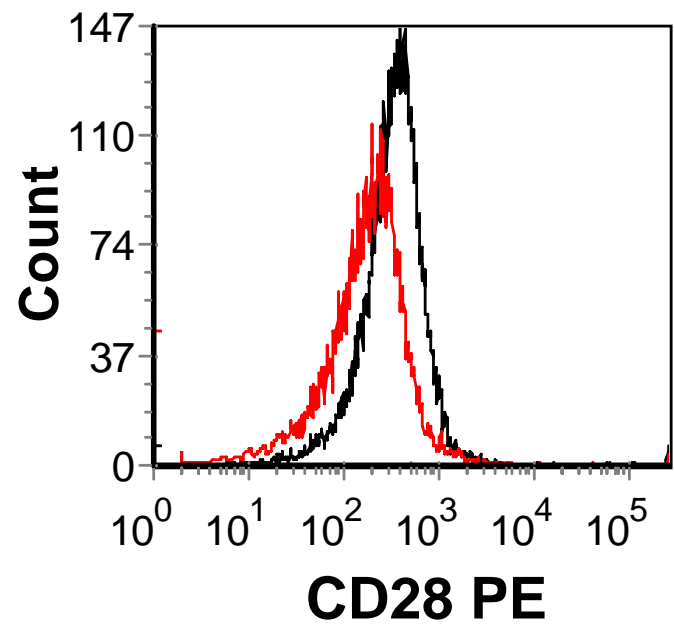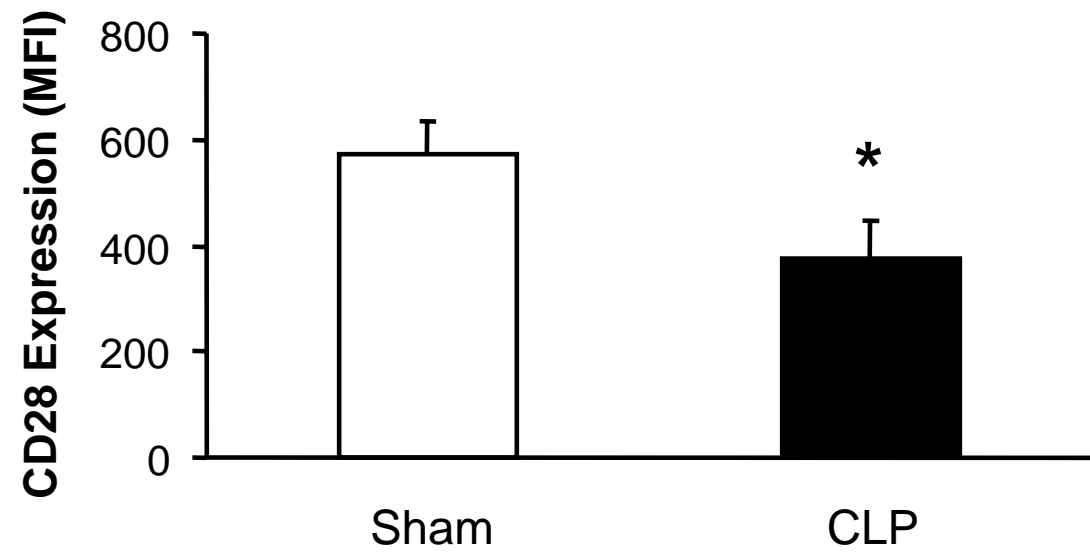**B**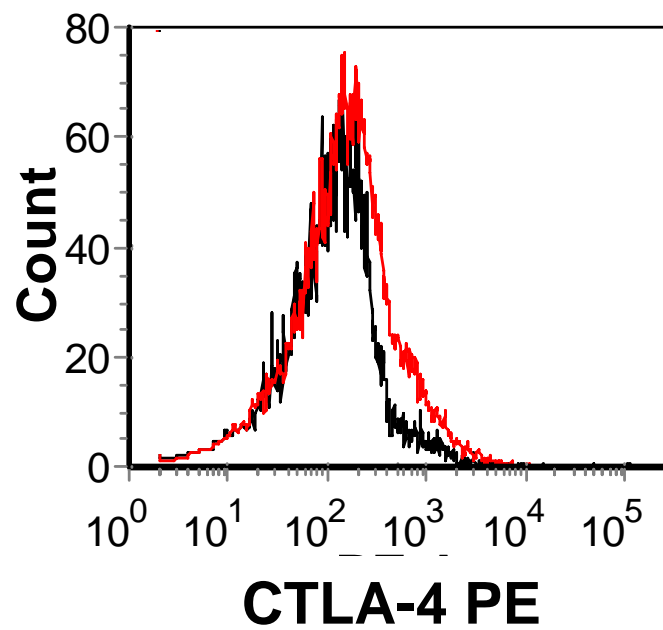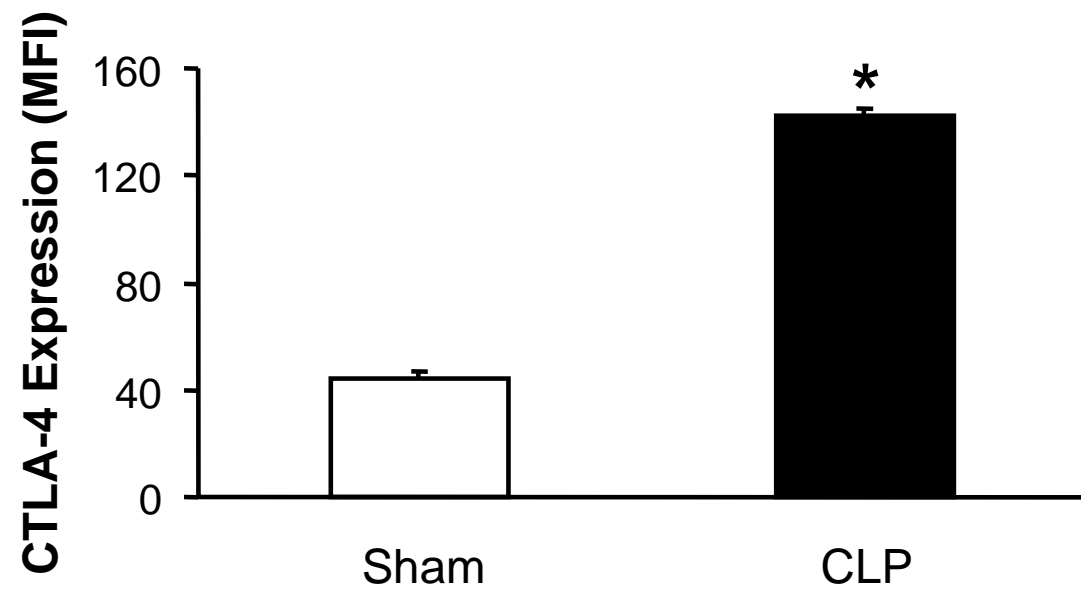

**C**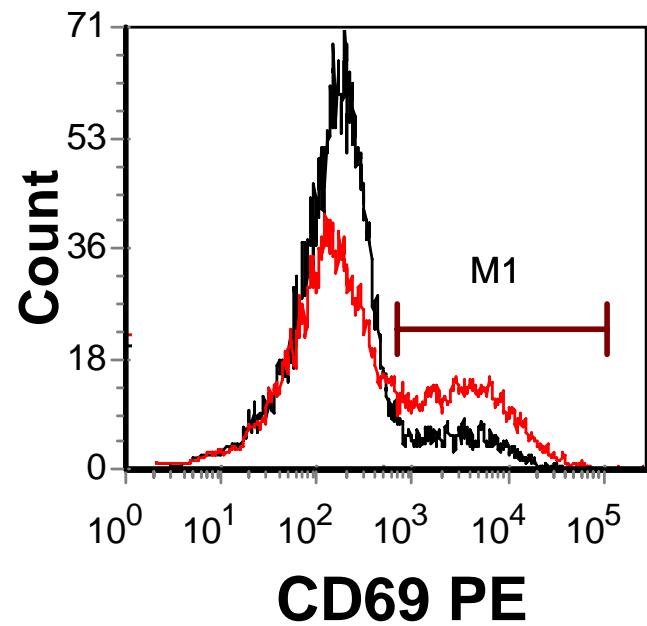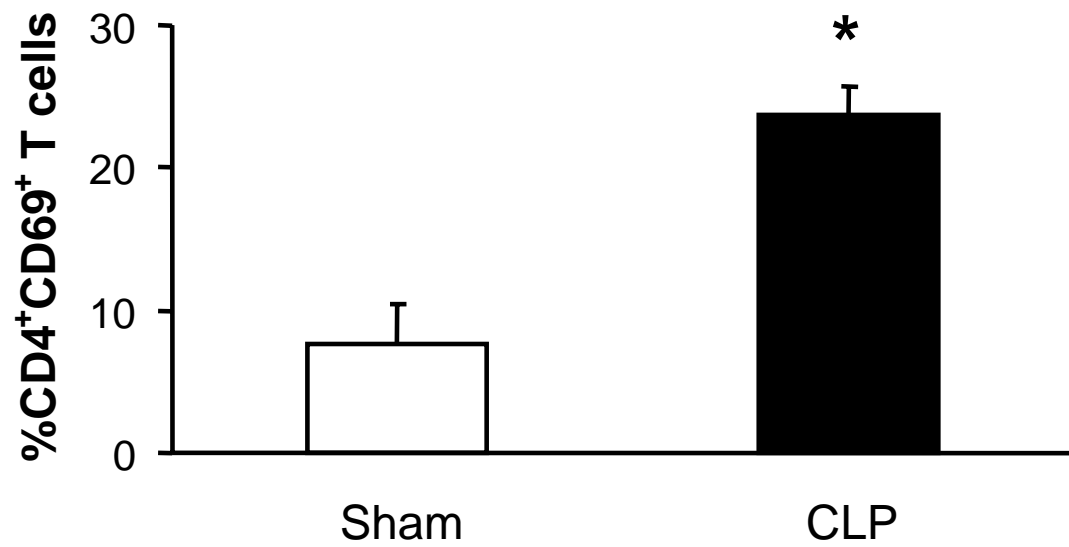**D**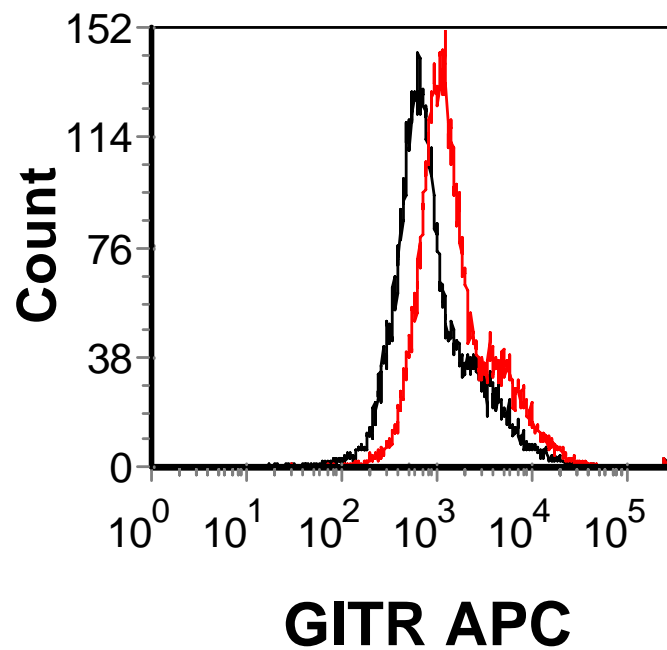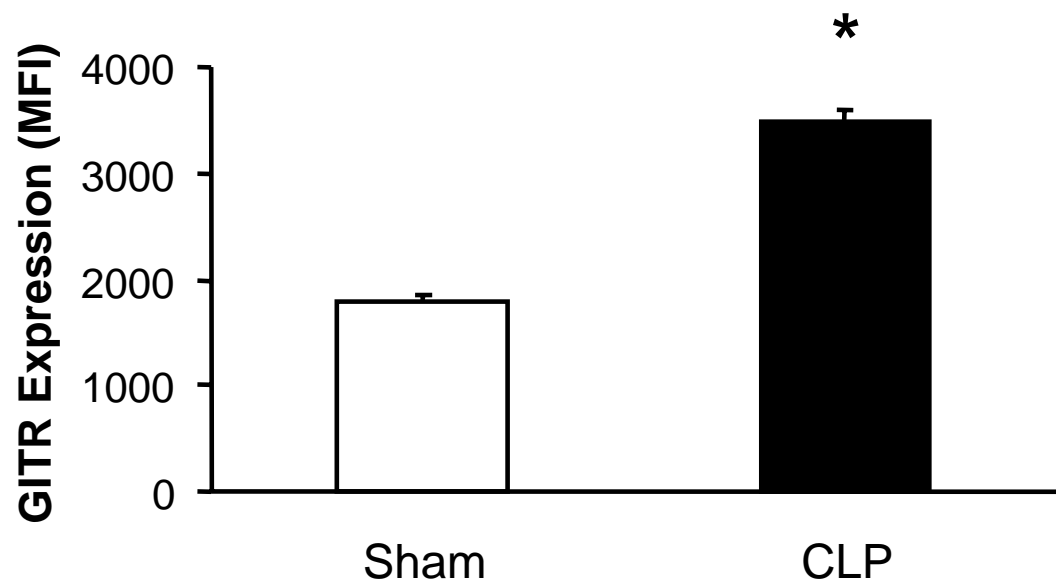

Supplement: blood_blood-2007-04-087171_2.pdf [file blood_blood-2007-04-087171_2.pdf]
